# Supplementary material
Source: Springer Nature journal article supplement (https://www.springermedizin.de/resource/supplementary/13075_2013_4209_MOESM10_ESM.pdf/9696324)

a)

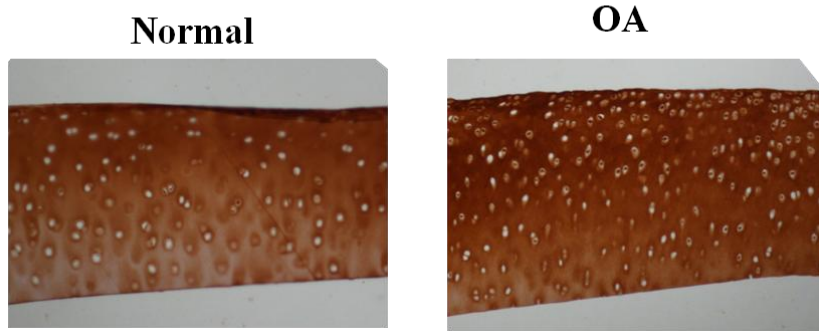

b)

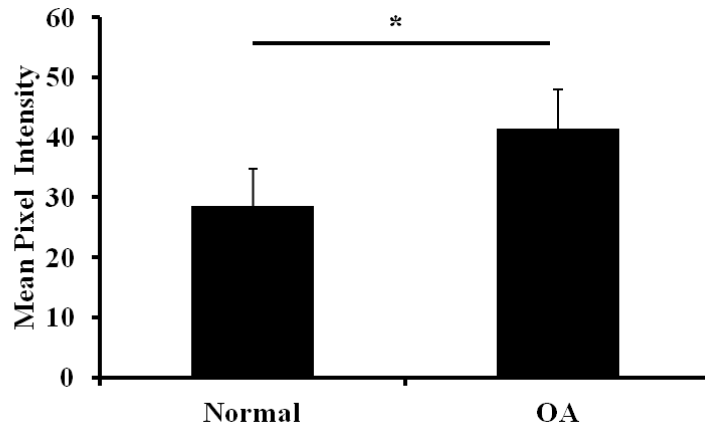

Supplement: MOESM10 [file 9696324]
